# Supplementary material for: A new device to mount portable energy dispersive X-ray fluorescence spectrometers (p-ED-XRF) for semi-continuous analyses of split (sediment) cores and solid samples
Source: Copernicus journal article supplement (doi:10.5194/gi-2016-33), 2016-11-08
Supplement: Supplementary file 1 [file gi-2016-33-supplement.pdf]

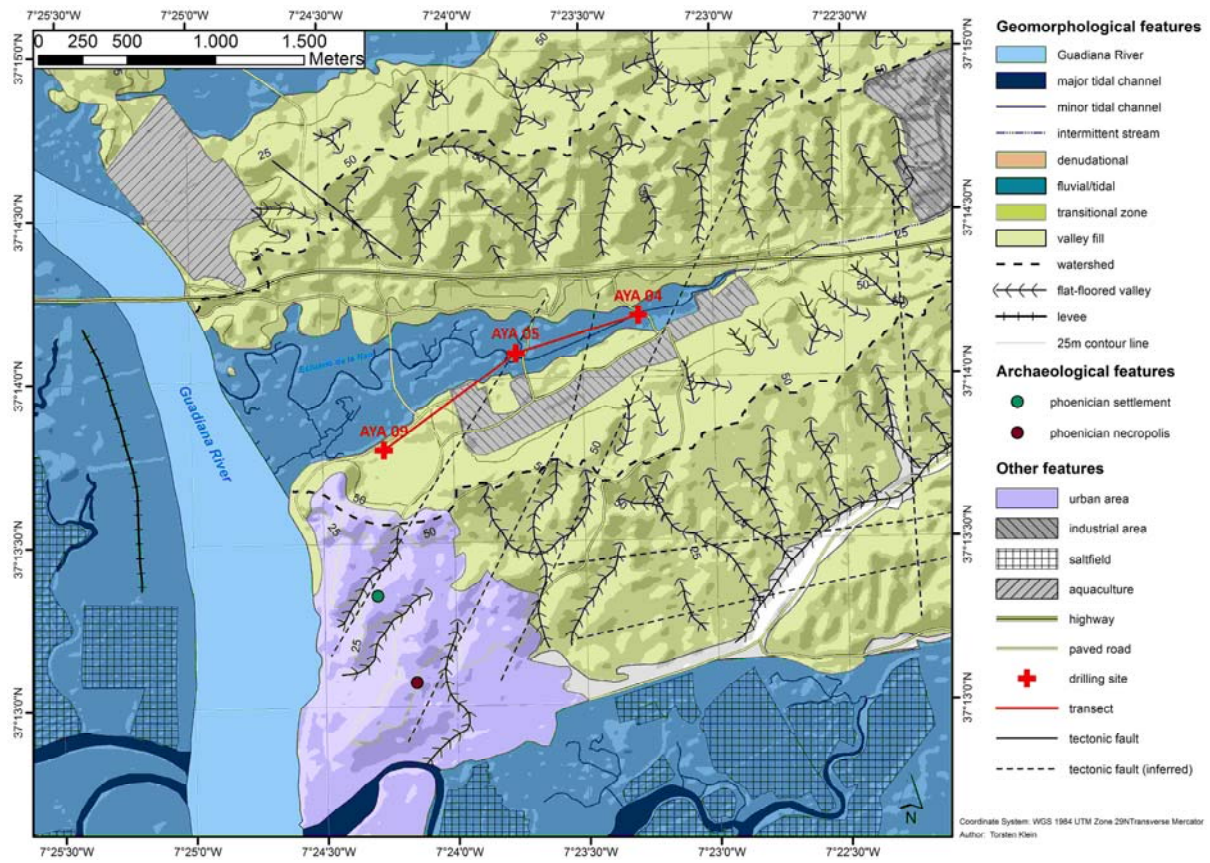

**Figure S1.** Geomorphological map of the Estero de la Nao and its environs including archaeological features and drilling sites (after Klein et al., 2016, in press).

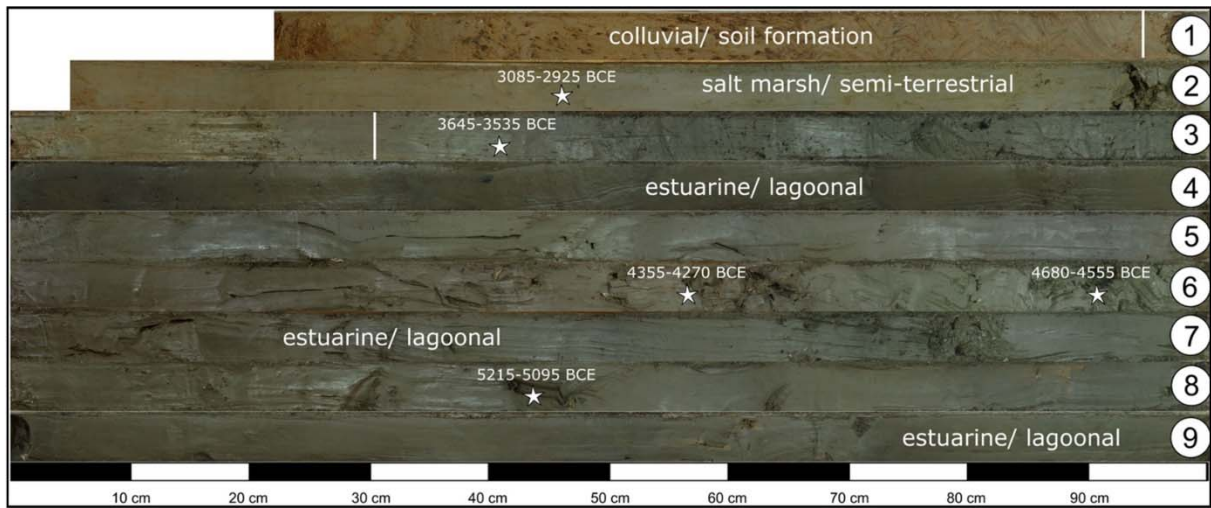

**Figure S2.** Simplified facies profile and radiocarbon dates of core AYA05 showing estuarine lagoonal deposits overlain by salt marsh-terrestrial sediments superposed by colluvial and soil formation layers (after Klein et al. 2016, in press).
